# Supplementary material for: Synchronized mesenchymal cell polarization and differentiation shape the formation of the murine trachea and esophagus
Source: PubMed Central journal article supplement (PMC6053463; doi:10.1038/s41467-018-05189-2), 2018-07-19
Supplement: 41467_2018_5189_MOESM1_ESM.pdf [file 41467_2018_5189_MOESM1_ESM.pdf]

## Supplementary Information for

**Synchronized mesenchymal cell polarization and differentiation  
shape the formation of murine trachea and esophagus**

by **Kishimoto et al.,**

**Supplementary Table 1 Primary antibody list and conditions for immunofluorescence.**

| <b>Antibody, Dilution</b>                | <b>Company, Catalog code</b>                                               | <b>Fixative</b> | <b>Tissue Preparation</b> | <b>Antigen retrieval</b>                       | <b>Secondary antibody, Amplification</b> |
|------------------------------------------|----------------------------------------------------------------------------|-----------------|---------------------------|------------------------------------------------|------------------------------------------|
| phospho-Histon H3<br>(1:100)             | Santa Cruz<br>Biotechnology, Inc,<br>sc-12927                              | 4% PFA          | Paraffin                  | 105°C for 15 min<br>in Histo <sup>VT</sup> One | Rabbit-Alexa488                          |
| CDH1<br>(1:800)                          | Cell Signaling<br>Technology,<br>#3195                                     | 4% PFA          | Paraffin                  | 105°C for 15 min<br>in Histo <sup>VT</sup> One | Rabbit-Alexa488                          |
| β-catenin<br>(1:200)                     | Cell Signaling<br>Technology,<br>#8847                                     | 4% PFA          | Paraffin                  | 105°C for 15 min<br>in Histo <sup>VT</sup> One | Mouse-Alexa488                           |
| Phospho-MLC2<br>(Ser 19)                 | Cell Signaling<br>Technologies, ell<br>Signaling<br>Technologies,<br>#3675 | 4% PFA          | Paraffin                  | 105°C for 15 min<br>in Histo <sup>VT</sup> One | Mouse-Alexa488                           |
| Phospho-MLC2<br>(Thr19/Ser19)<br>(1/200) | Cell Signaling<br>Technology,<br>#3674                                     | 4% PFA          | Paraffin                  | 105°C for 15 min<br>in Histo <sup>VT</sup> One | Rabbit-Alexa488                          |
| Cy3-SMA<br>(1:1,000)                     | Sigma-Aldrich,<br>C6198                                                    | 4% PFA          | Paraffin                  | 105°C for 15 min<br>in Histo <sup>VT</sup> One |                                          |
| SM22α<br>(1:1,000)                       | Abcam,<br>ab14106                                                          | 4% PFA          | Paraffin                  | 105°C for 15 min<br>in Histo <sup>VT</sup> One | Rabbit-Alexa594                          |
| GM130<br>(1:100)                         | BD Biosciences,<br>610822                                                  | 4% PFA          | Paraffin                  | 105°C for 15 min<br>in Histo <sup>VT</sup> One | Mouse-Alexa488                           |
| γ-tubulin<br>(1/100)                     | Abcam,<br>Ab11321                                                          | 4% PFA          | Paraffin                  | 105°C for 15 min<br>in Histo <sup>VT</sup> One | Rabbit-Alexa647                          |
| Sox9<br>(1/100)                          | MILLIPORE,<br>AB5535                                                       | 4% PFA          | Paraffin                  | 105°C for 15 min<br>in Histo <sup>VT</sup> One | Rabbit-Alexa488                          |
| Foxj1<br>(1/100)                         | Gift from Dr.<br>Steven L. Brody                                           | 4% PFA          | Paraffin                  | 105°C for 15 min<br>in Histo <sup>VT</sup> One | Mouse-Alexa488                           |
| CC10 (T-18)<br>(1/400)                   | Santa Cruz<br>Biotechnology, Inc,<br>sc-9772                               | 4% PFA          | Paraffin                  | 105°C for 15 min<br>in Histo <sup>VT</sup> One | Goat-Alexa594                            |
| Krt5<br>(1/800)                          | Abcam,<br>Ab24647                                                          | 4% PFA          | Paraffin                  | 105°C for 15 min<br>in Histo <sup>VT</sup> One | Rabbit-Alexa647                          |
| GFP<br>(1/200)                           | Thermo Fisher<br>Scientific,<br>A10262                                     | 4% PFA          | Frozen                    | 90°C for 5 min in<br>Histo <sup>VT</sup> One   | Chicken-Alexa488                         |

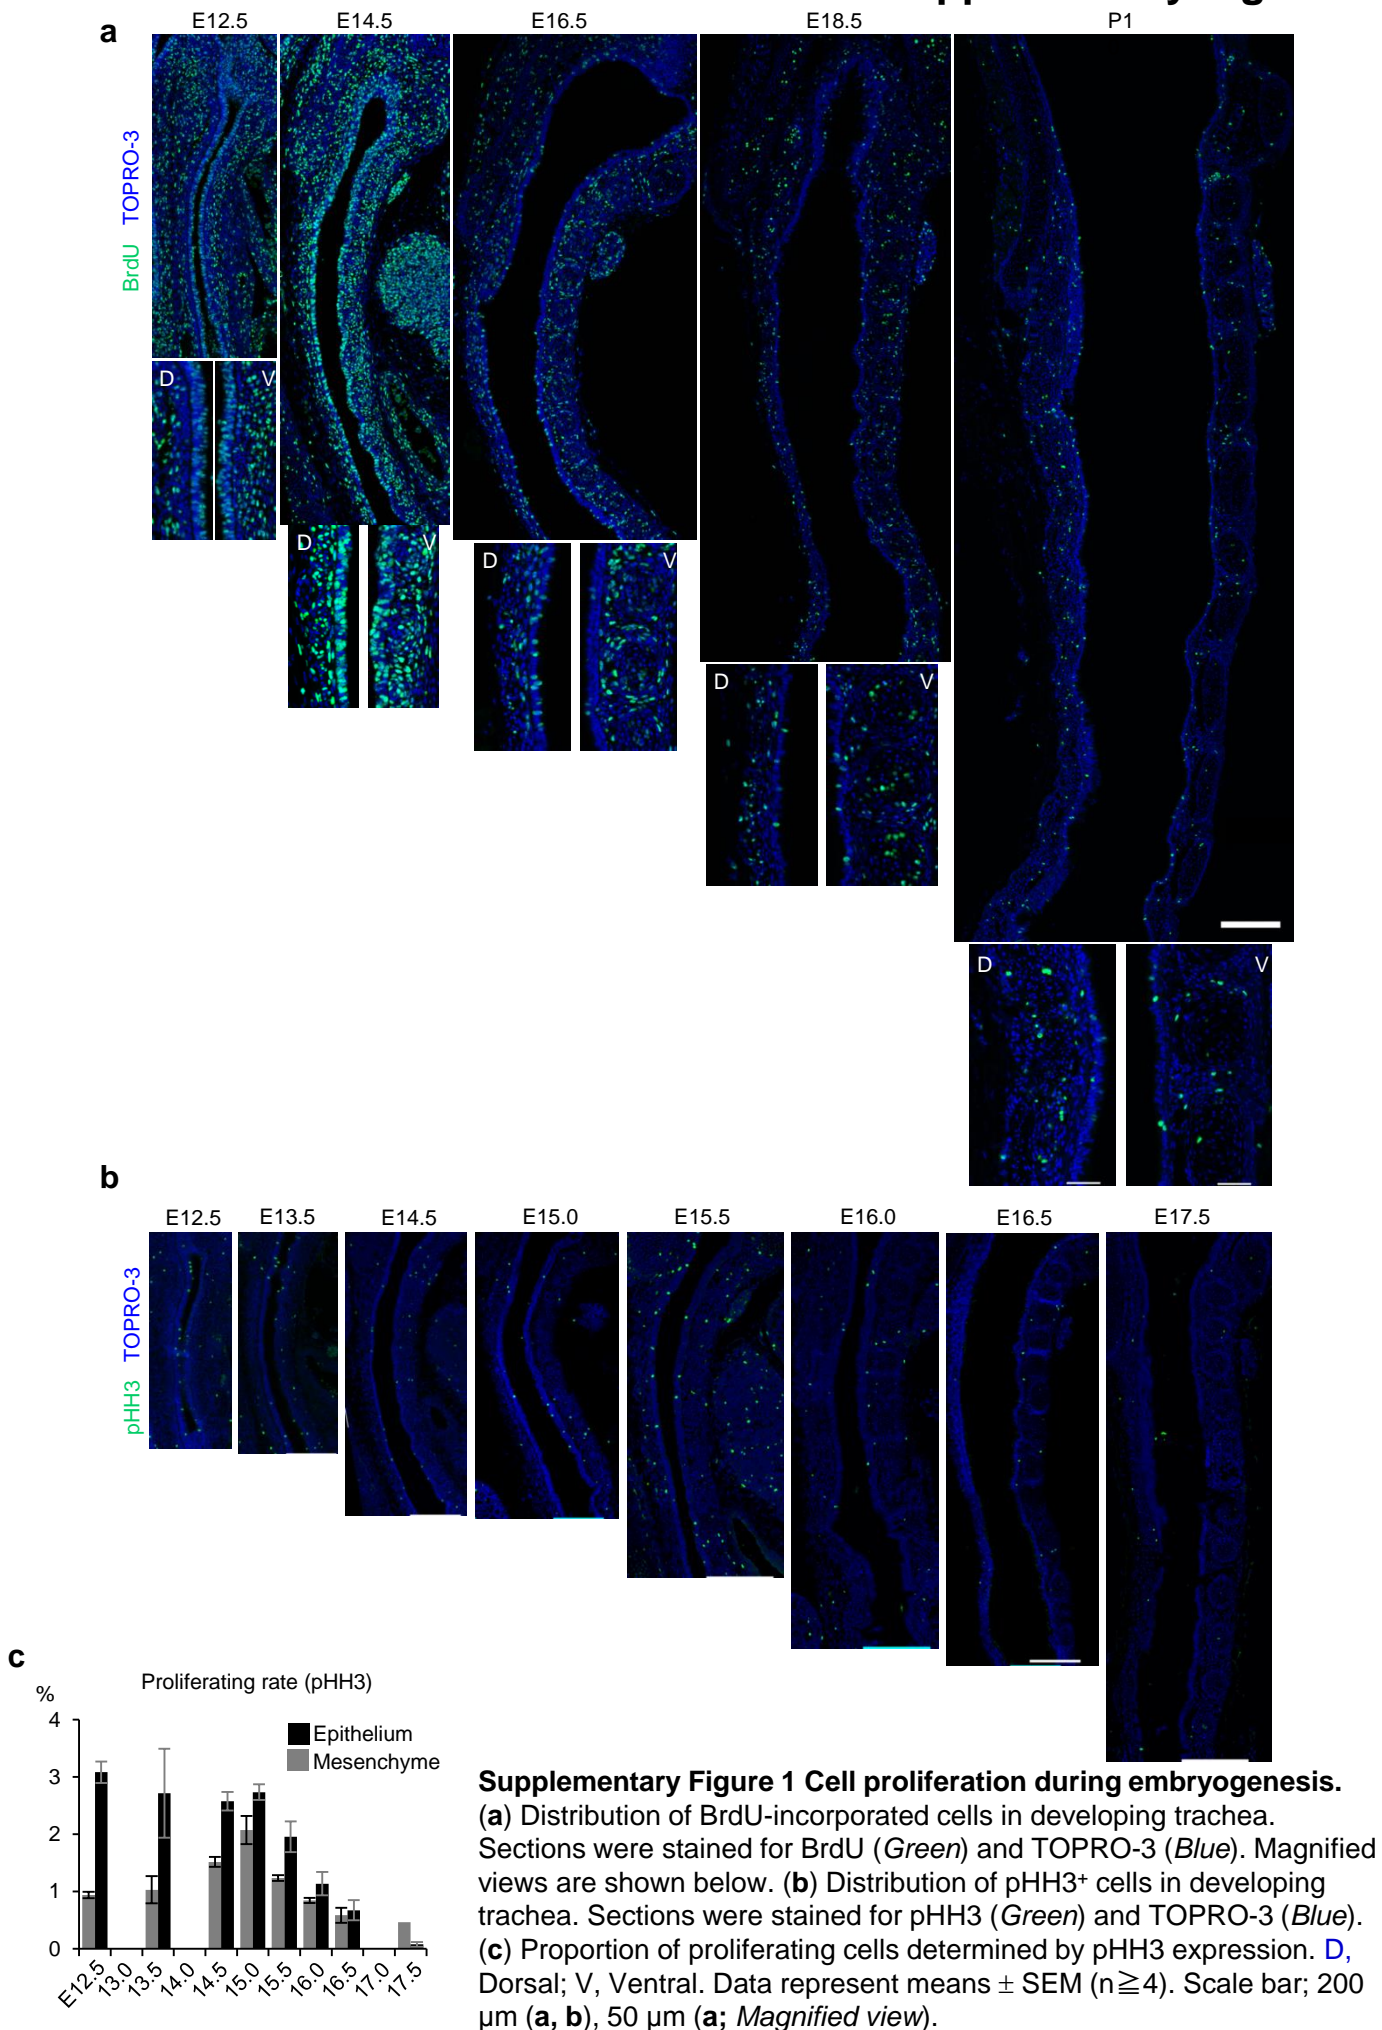

## Supplementary Figure 2

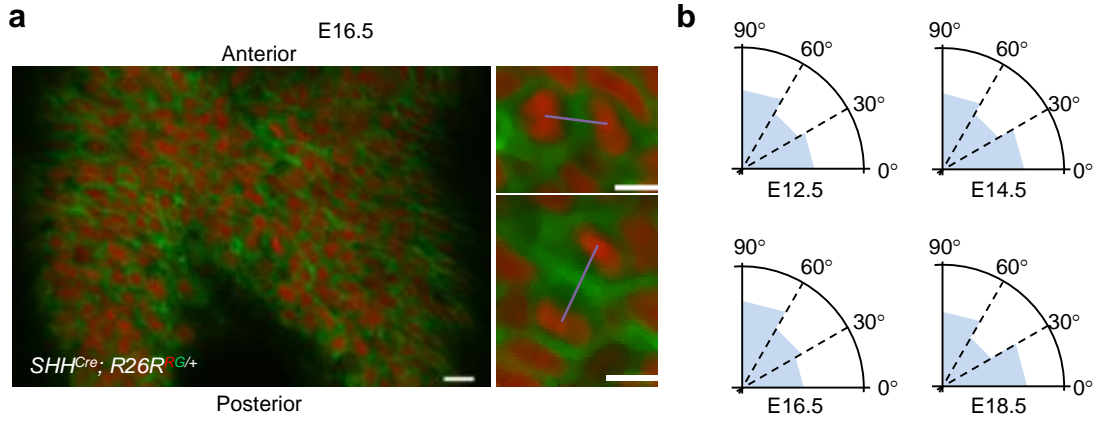

### Supplementary Figure 2 Orientation of cell division in epithelium during embryogenesis.

(a) Representative images of cell division in *SHH<sup>Cre</sup>; R26R<sup>RG</sup>* tracheal epithelium at E16.5. Red indicates nuclei genetically labeled by H2B-mCherry. Green indicates plasma membrane labeled by EGFP-GPI. (b) Quantification of cell division orientation based on (a). 0° corresponds to clockwise circumferential direction. 90° corresponds to anterior direction. (n = 30, 37, 35, and 23 in more than three embryos each for E12.5, 14.5, 16.5 and 18.5). Scale bar; 10  $\mu$ m.

# Supplementary Figure 3

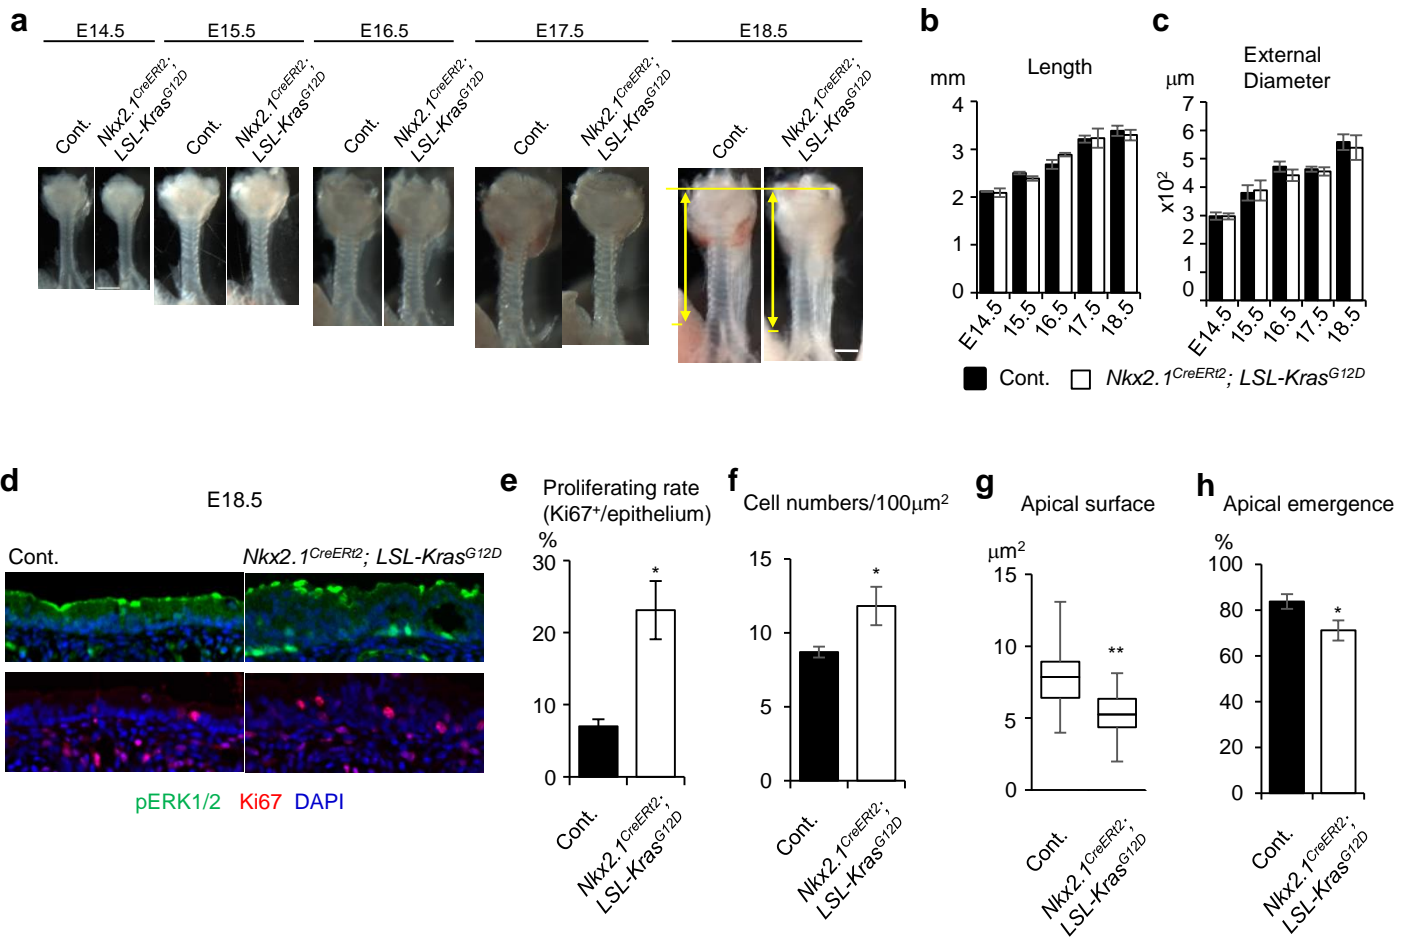

## Supplementary Figure 3 Ectopic epithelial cell proliferation in phase 2 inhibited epithelial rearrangement, but neither tube elongation nor expansion.

(a) Gross morphology of developing *Nkx2.1<sup>CreERt2</sup>; LSL-Kras<sup>G12D</sup>* trachea. Tube length (b). External diameter (c). Data represent means  $\pm$  SEM ( $n \geq 3$ ). (d) Ki67 expression and phosphorylated ERK1/2 in *Nkx2.1<sup>CreERt2</sup>; LSL-Kras<sup>G12D</sup>* trachea. Sections were stained for pERK1/2 (Green), Ki67 (Red), and DAPI (Blue). (e) Rate of proliferating epithelial cells determined by Ki67 expression at E18.5. Data represent means  $\pm$  SEM ( $n=3$ ). (f) The number of GFP<sup>+</sup> epithelial cells per 100  $\mu\text{m}^2$ . Data represent means  $\pm$  SD (Control,  $n = 123$ , *Nkx2.1<sup>CreERt2</sup>; LSL-Kras<sup>G12D</sup>*,  $n = 167$  in 3 fields, respectively). (g) Apical surface area of GFP<sup>+</sup> epithelial cells at E18.5. Centre line, box limits and whiskers represent mean, 25 and 75% confidence limits, and min and max values, respectively. (Control,  $n = 52$ , *Nkx2.1<sup>CreERt2</sup>; LSL-Kras<sup>G12D</sup>*,  $n = 50$ ) (h) Proportion of luminal cells in GFP<sup>+</sup> epithelial cells. Data represent means  $\pm$  SD (Control,  $n = 123$ , *Nkx2.1<sup>CreERt2</sup>; LSL-Kras<sup>G12D</sup>*,  $n = 167$  in 3 fields, respectively). P values (\*;  $P < 0.05$ , \*\*;  $P < 0.01$ ) show the significance with Student's *t*-test, NS, Not Significance

a

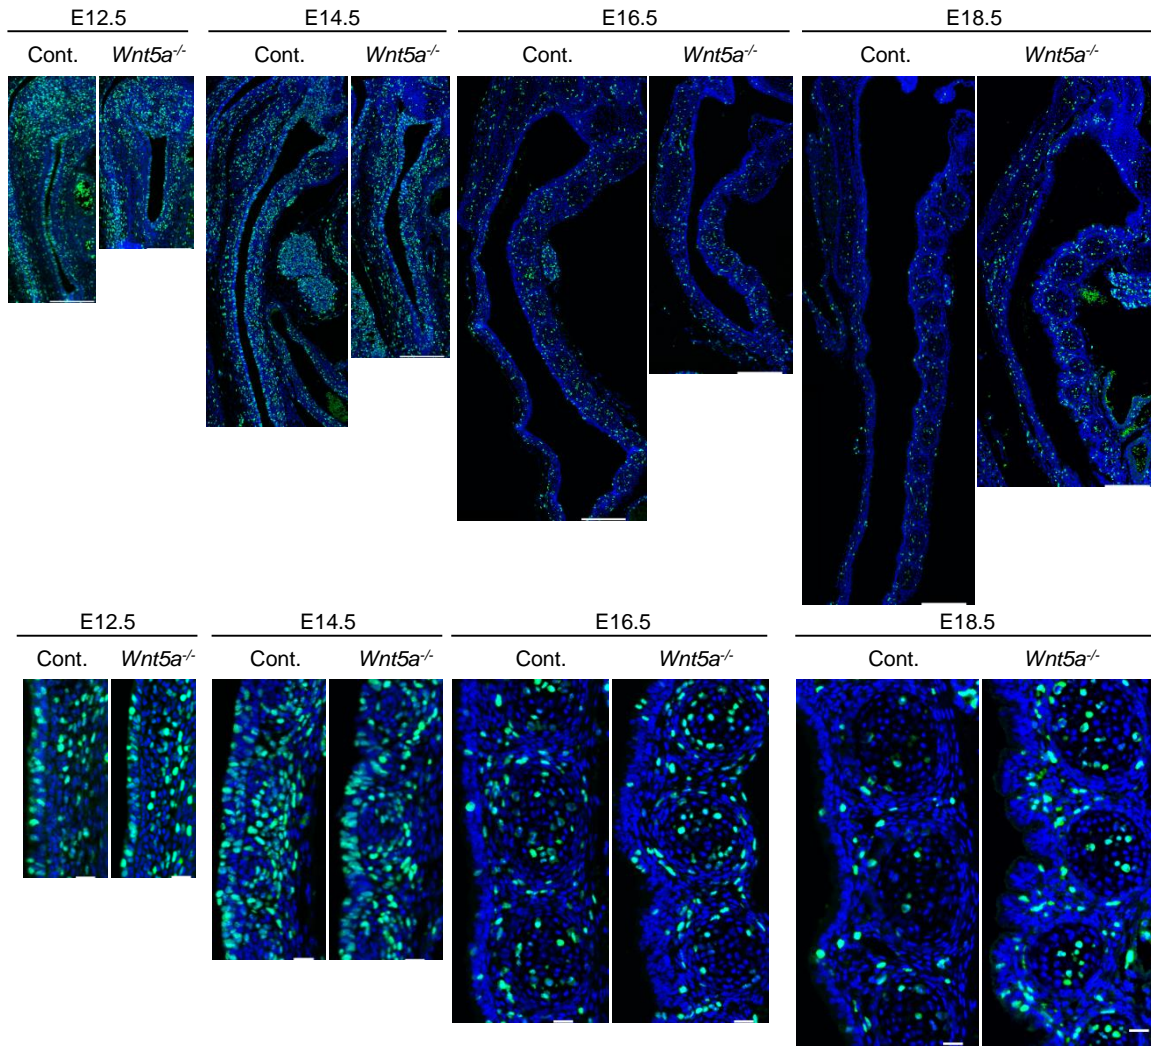

b

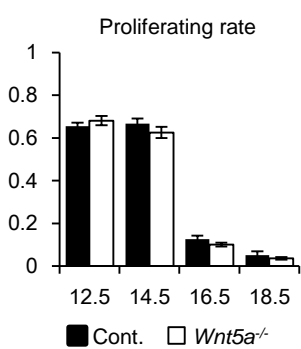

c

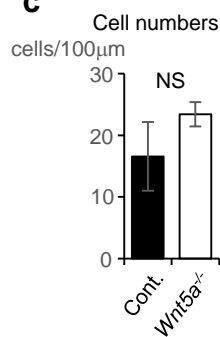

d

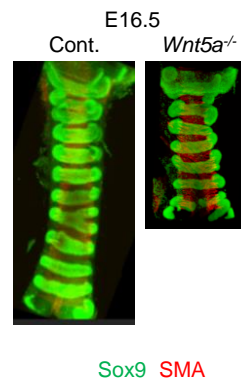

### Supplementary Figure 4 Cell proliferation of epithelial cells in developing *Wnt5a*<sup>-/-</sup> trachea.

(a) Distribution of BrdU-incorporated cells in developing trachea of *Wnt5a*<sup>-/-</sup> mice. Sections were stained for BrdU (Green) and TOPRO-3 (Blue). Magnified views are shown below. (b) Rate of proliferating epithelial cells determined by BrdU-incorporation assay. Each column indicates the mean with SEM (n=3). (c) Epithelial cell numbers per 100 μm in *Wnt5a*<sup>-/-</sup> trachea at E12.5. (d) Cartilage morphology in *Wnt5a*<sup>-/-</sup> trachea and control at E16.5. Whole tracheas were stained for Sox9 (Green) and SMA (Red). D, Dorsal; V, Ventral. Data represent means ± SEM (n ≥ 4). Scale bar; 200 μm (a, upper panel, d), 20 μm (a; Magnified view).

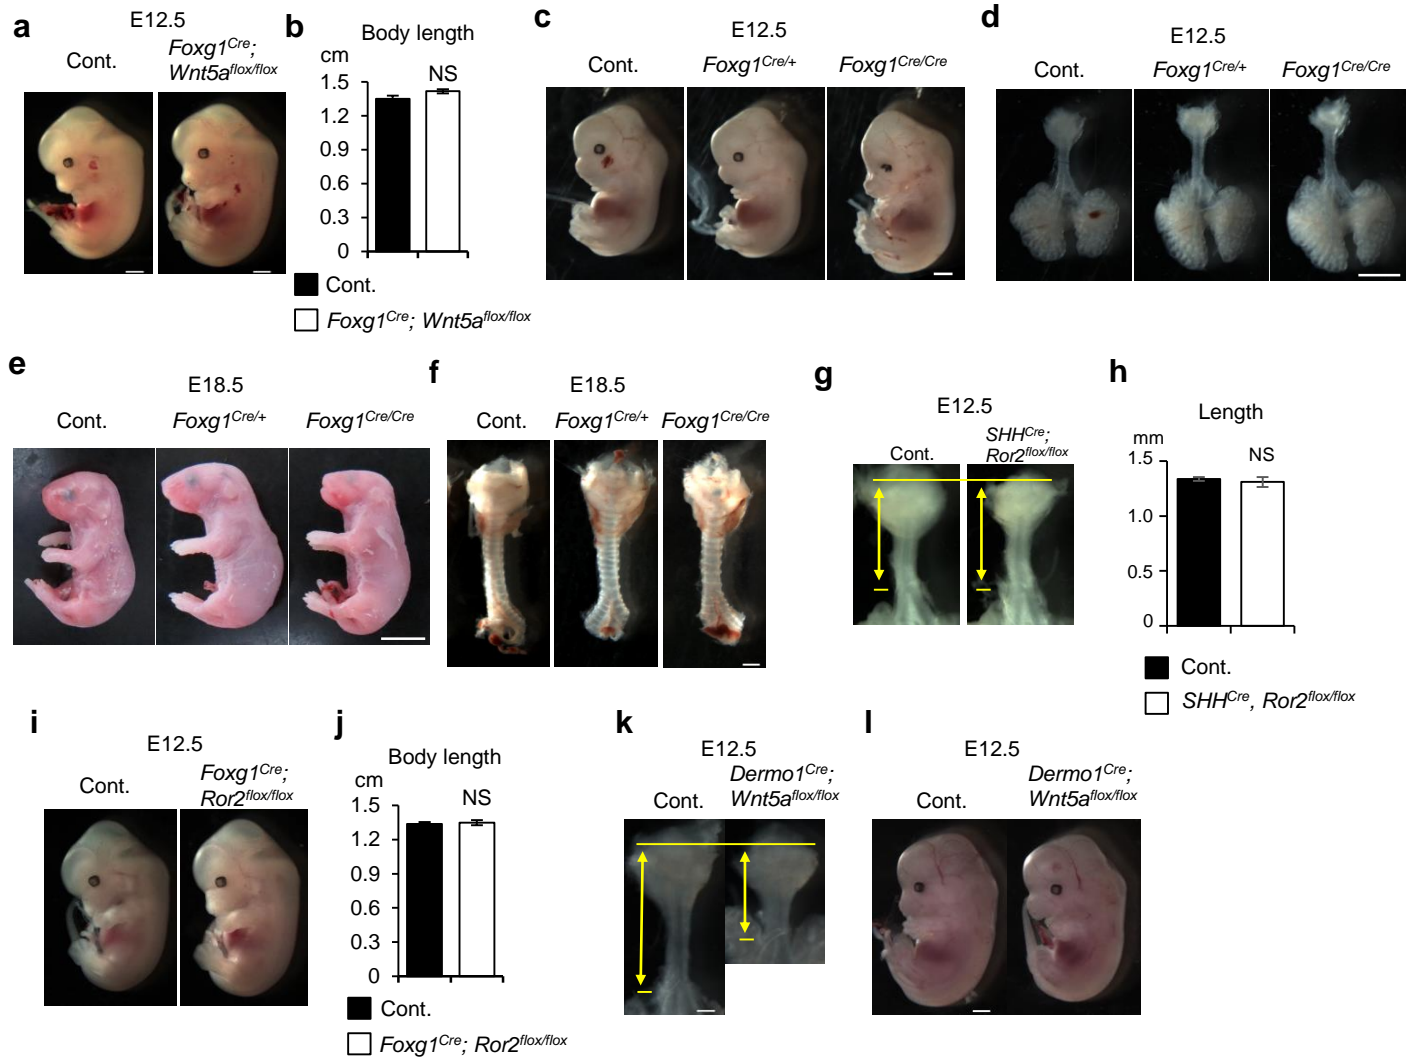

## Supplementary Figure 5 Indistinguishable appearance of splanchnic mesodermal Wnt5a or Ror2 mutant embryos from control.

(a, i, l) Gross morphology of *Foxg1<sup>Cre</sup>, Wnt5a<sup>flox/flox</sup>* (a), *Foxg1<sup>Cre</sup>, Ror2<sup>flox/flox</sup>* (i), and *Dermo1<sup>Cre</sup>, Wnt5a<sup>flox/flox</sup>* (l), embryos at E12.5. (b and j) Body length of *Foxg1<sup>Cre</sup>, Wnt5a<sup>flox/flox</sup>* (b) and *Foxg1<sup>Cre</sup>, Wnt5a<sup>flox/flox</sup>* (j) embryos at E12.5 (Control; n=5, *Foxg1<sup>Cre</sup>; Wnt5a<sup>flox/flox</sup>* n=6; Control; n=4, *Foxg1<sup>Cre</sup>, Ror2<sup>flox/flox</sup>*; n=3). (c and e) Gross morphology of *Foxg1<sup>Cre/+</sup>*, and *Foxg1<sup>Cre/Cre</sup>* embryos at E12.5 (c) and 18.5 (e). (d and f) Gross morphology of *Foxg1<sup>Cre/+</sup>*, and *Foxg1<sup>Cre/Cre</sup>* tracheas at E12.5 (d) and 18.5 (f). (g and k) Gross morphology of *SHH<sup>Cre</sup>; Ror2<sup>flox/flox</sup>* trachea, and *Dermo1<sup>Cre</sup>, Wnt5a<sup>flox/flox</sup>* (k) at E12.5. (h) Tracheal tube length (Control; n = 3, *SHH<sup>Cre</sup>, Ror2<sup>flox/flox</sup>*; n = 5). NS, Not Significance Scale bar, 1cm (e), 1mm (c, d, l), 500µm (f), 200µm (k)

**a**

E11.5

E12.5

Cont.

*Wnt5a*<sup>-/-</sup>

Cont.

*Wnt5a*<sup>-/-</sup>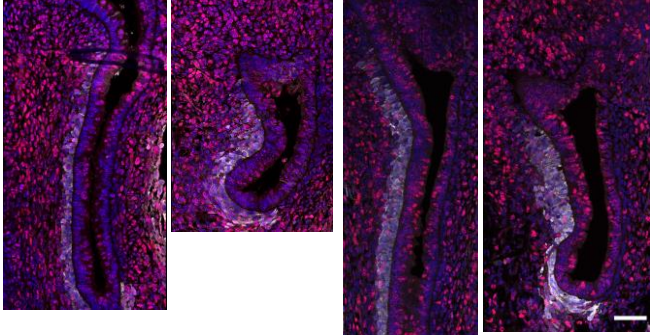SM22 $\alpha$  Ki67 DAPI**b**Proliferating rate (Ki67<sup>+</sup>/Total SM)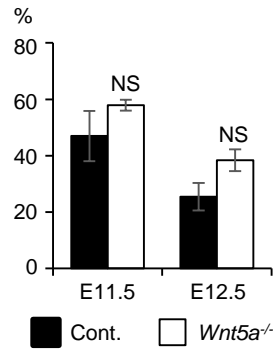

**Supplementary Figure 6 Cell proliferation of SM cells in *Wnt5a*<sup>-/-</sup> trachea during elongation process.**

(a) Distribution of proliferating Ki67<sup>+</sup> SM cells in *Wnt5a*<sup>-/-</sup> trachea and control littermate at E11.5 and 12.5. Sections were stained for Ki67 (Red), SM22 $\alpha$  (White) and DAPI (Blue). Magnified views are shown below. (b) Proliferating rate of SM cells, which is determined by Ki67 expression. Data represent means  $\pm$  SEM (n=3). NS; Not Significance. Scale bar; 50  $\mu$ m



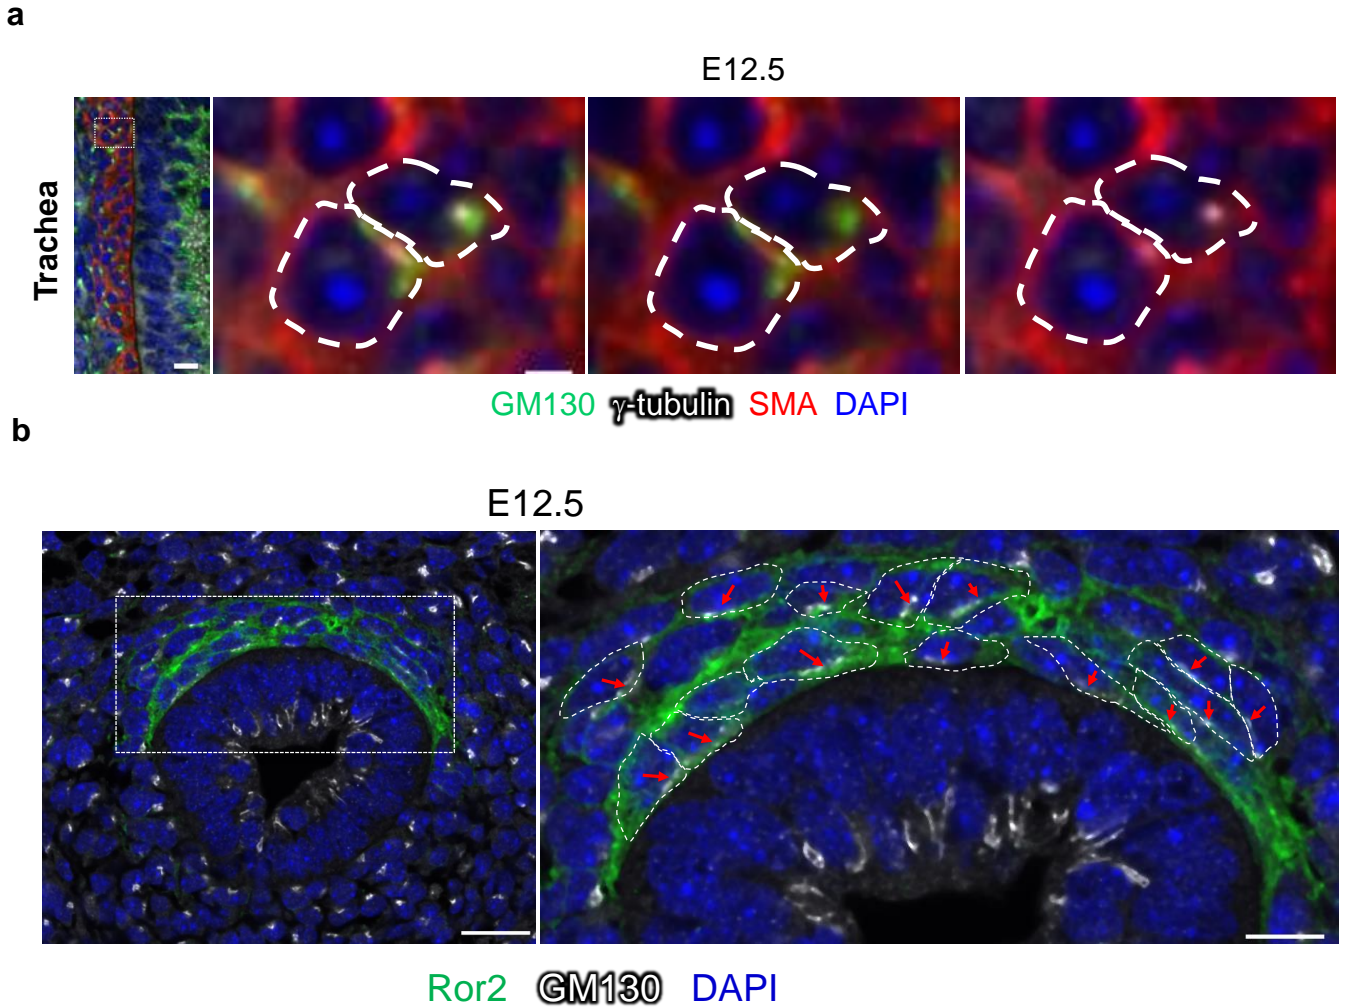

**Supplementary Figure 7 Subepithelial cell polarity of smooth muscle cells are determined by the Golgi-apparatus and centrosome positions relative to the nucleus.**

(a) Smooth muscle cells in subepithelial layer show synchronized cell polarity toward epithelium. Sagittal sections of E12.5 trachea were stained for GM130 (Golgi-apparatus; *Green*),  $\gamma$ -tubulin (Centrosome; *White*), SMA (Smooth muscle; *Red*), and DAPI (nucleus; *Blue*). Scale Bar; 10  $\mu$ m (Low magnification), 2  $\mu$ m (High magnification). (b) Radial cell polarity toward epithelium. Transversal sections were stained for Ror2 (*Green*), GM130 (*White*), and DAPI (*Blue*). Red arrows indicate the direction of polarity. Scale bar; 20  $\mu$ m (Low magnification), 10  $\mu$ m (High magnification).

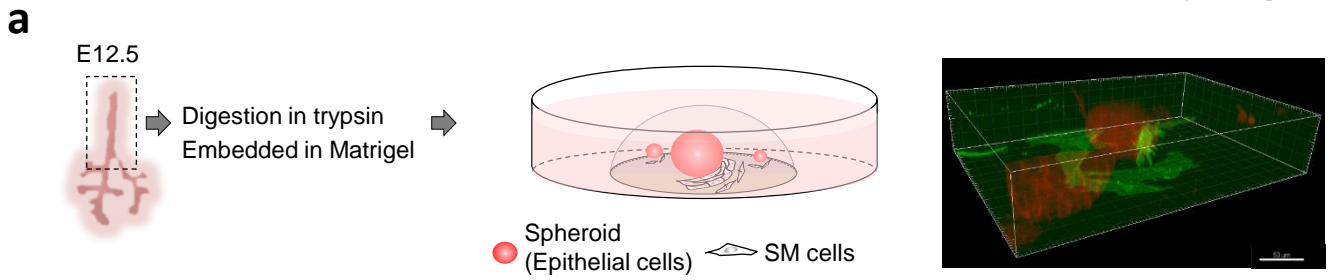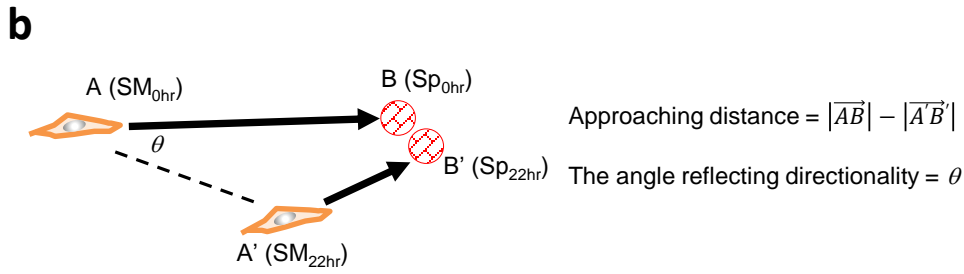

**Supplementary Figure 8 Directional migration of SM cells to the epithelium *in vitro*.** (a) 3D co-culture system of primary SM cells and epithelial cells. (b) Quantification of approaching distance and directionality. See Materials and Methods for details.

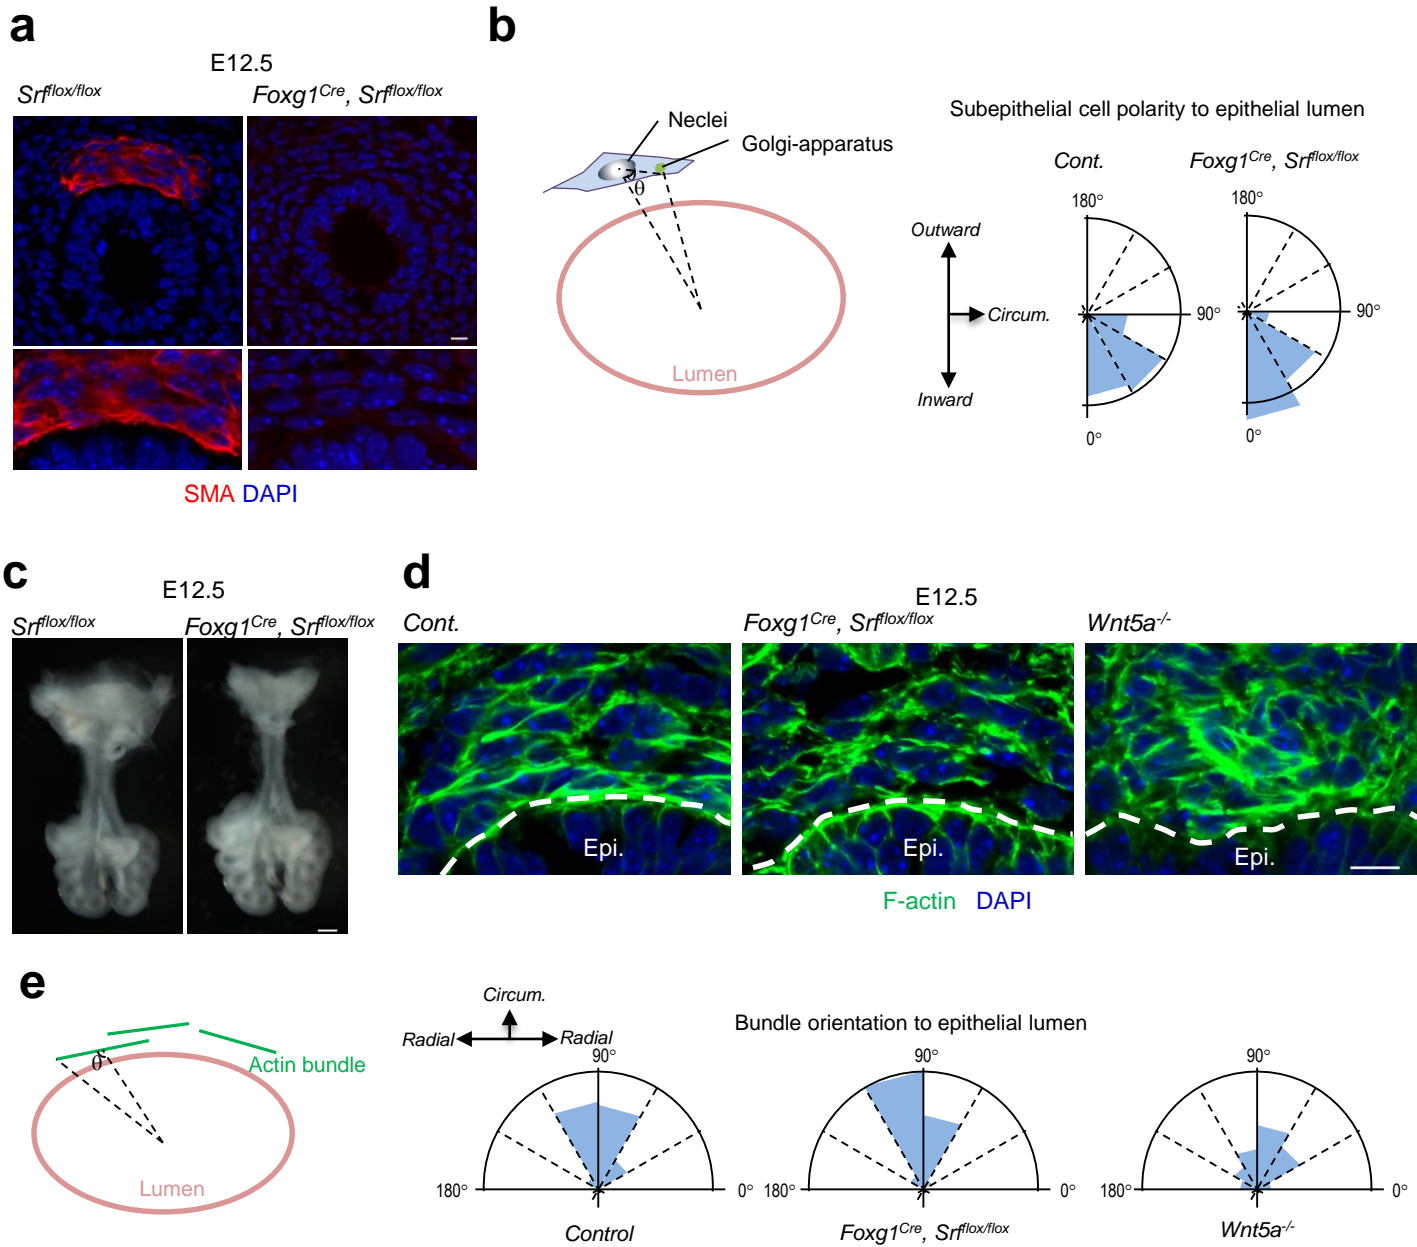

**Supplementary Fig. 9 Normal tracheal tube elongation and subepithelial cell polarity in *Foxg1<sup>Cre</sup>, Srf<sup>flox/flox</sup>* mice.**

(a) SM morphology in *Foxg1<sup>Cre</sup>, Srf<sup>flox/flox</sup>* trachea and control at E12.5. Transversal sections were stained for SMA (Red), DAPI (Blue). Coronal (Upper) and transversal (Lower) sections. (b) QUantification of subepithelial cell polarity, determined by the Golgi-apparatus position relative to the nucleus. (Control; n=26, *Foxg1<sup>Cre</sup>, Srf<sup>flox/flox</sup>*; n=29) (c) Gross morphology of *Foxg1<sup>Cre</sup>, Srf<sup>flox/flox</sup>* tracheas and littermate control at E12.5. (d) Cell morphology at dorsal subepithelial tissue in *Foxg1<sup>Cre</sup>, Srf<sup>flox/flox</sup>* and *Wnt5a<sup>-/-</sup>* trachea. Sections were stained for F-actin (Green), DAPI (Blue). (e) Quantification of bundle orientation toward lumen. (Control; n=47, *Foxg1<sup>Cre</sup>, Srf<sup>flox/flox</sup>*; n=44, *Wnt5a<sup>-/-</sup>*; n=50) Epi.; Epithelium, Scale bar, 200  $\mu$ m (c), 10  $\mu$ m (a, b, d)

a

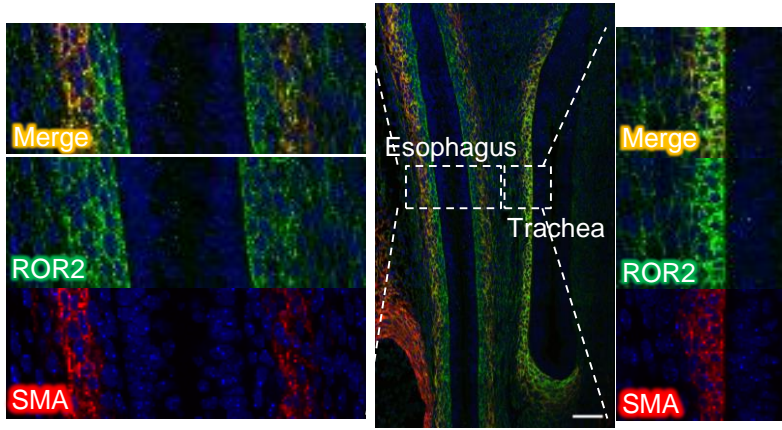

b

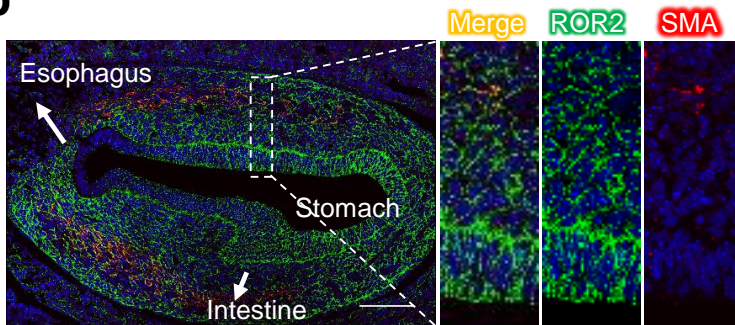

c

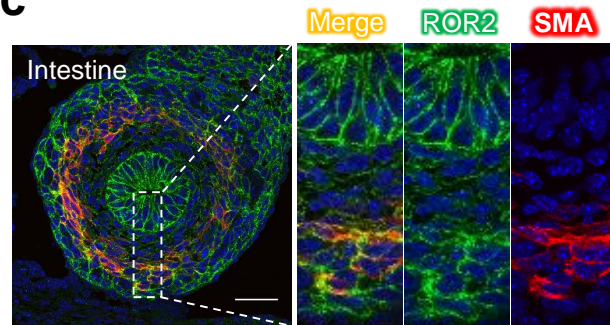

**Supplementary Figure 10 The distribution of Ror2 protein in diverse organs derived from foregut endoderm.**

(a-c) Expression of Ror2 in the esophagus (a, b), trachea (a), stomach (b), and intestine (c) at E12.5. Sections were stained for Ror2 (Green), SMA (Red). Nuclei were counterstained by DAPI (Blue). Scale bar; 100 $\mu$ m (b), 50 $\mu$ m (a), 40 $\mu$ m (c).

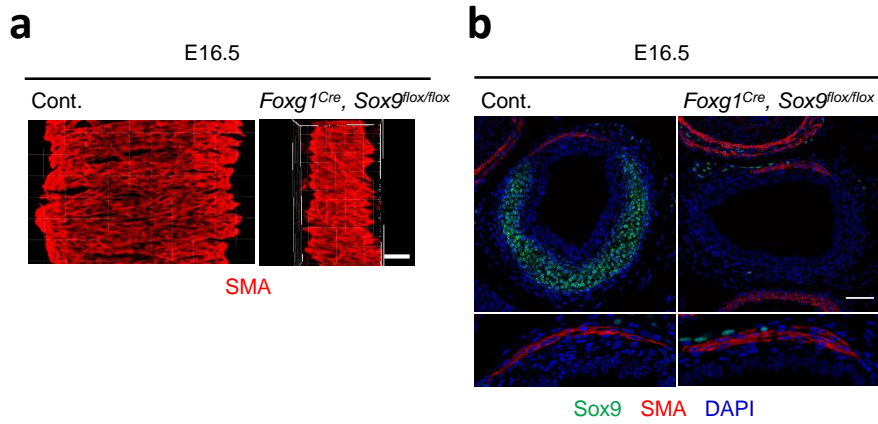

**Supplementary Figure 11 Cartilage and SM architecture of the tracheas in *Foxg1<sup>Cre</sup>, Sox9<sup>flox/flox</sup>* mice.** (a) SM morphology in *Foxg1<sup>Cre</sup>, Sox9<sup>flox/flox</sup>* trachea and control at E16.5. Whole tracheas were stained for SMA (Red). Coronal sections were shown. (b) Cartilage and SM histology of *Foxg1<sup>Cre</sup>, Sox9<sup>flox/flox</sup>* tracheas. Sections were stained for Sox9 (Green), SMA (Red) and DAPI (Blue). Magnified views are shown below. Scale bar, 50  $\mu$ m

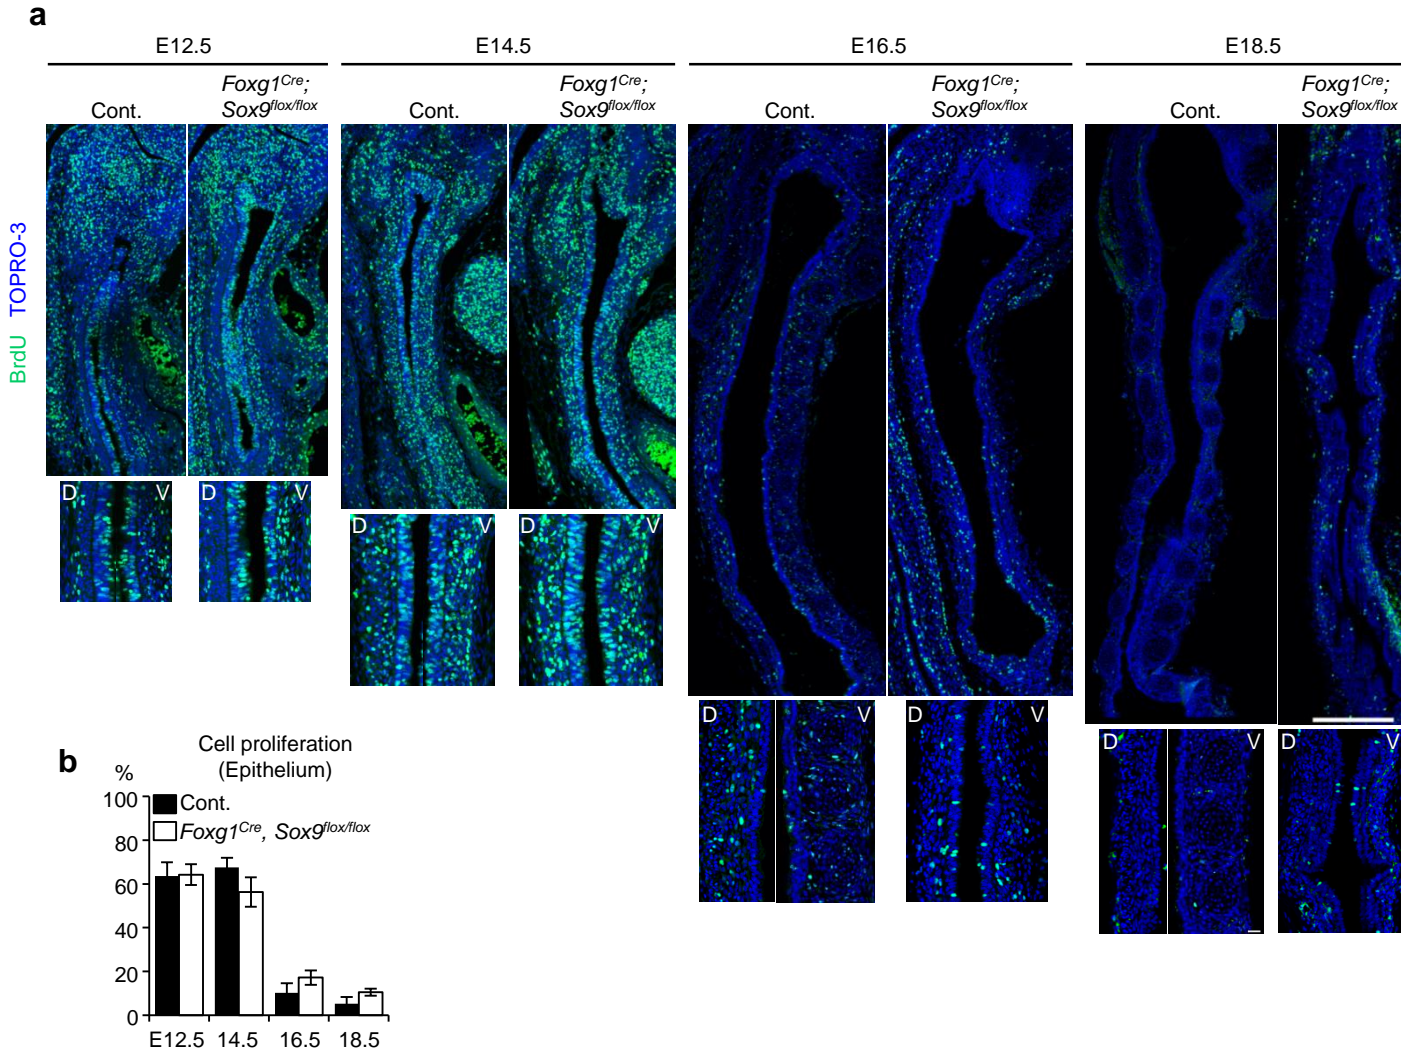

**Supplementary Figure 12 Cell proliferation of epithelial cells in *Foxg1<sup>Cre</sup>; Sox9<sup>flox/flox</sup>* tracheas.**

(a) Distribution of BrdU-incorporated cells in *Foxg1<sup>Cre</sup>; Sox9<sup>flox/flox</sup>* tracheas. Sections were stained for BrdU (Green) and TOPRO-3 (Blue). (b) Proportion of proliferating cells determined by cumulative BrdU incorporation assay in *Foxg1<sup>Cre</sup>; Sox9<sup>flox/flox</sup>* tracheas. (n = 4 or 5). Magnified views are shown below. D, Dorsal; V, Ventral. Data represent means  $\pm$  SEM (n  $\geq$  4). Scale bar; 200  $\mu$ m, 20  $\mu$ m (Magnified view).

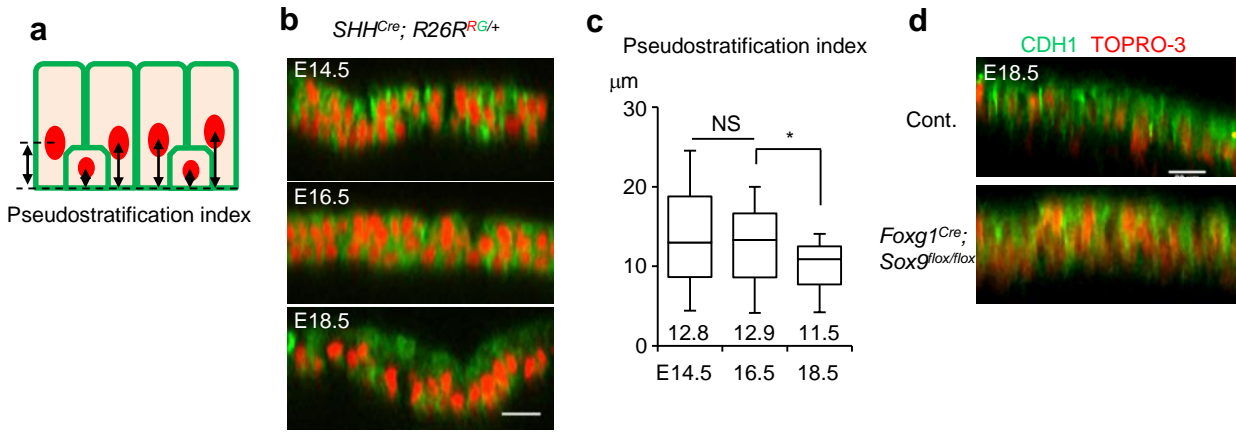

**Supplementary Figure 13 Pseudostratification index in *Foxg1<sup>Cre</sup>; Sox9<sup>lox/lox</sup>* tracheas.**

(a) Schematic model for calculating the pseudostratification index, the distance between the nuclear centroid to the basement membrane. (b) Optical image of the tracheal epithelium in *SHH<sup>Cre</sup>; R26R<sup>RG/+</sup>* mice. (c) Pseudostratification index in *SHH<sup>Cre</sup>; R26R<sup>RG/+</sup>*. Centre line, box limits and whiskers represent mean, 25 and 75% confidence limits, and min and max values, respectively. Numbers represent means (n = 264, 207, 152 cells in three embryos for E14.5, E16.5, and E18.5). (d) Optical image of the tracheal epithelium in *Foxg1<sup>Cre</sup>; Sox9<sup>lox/lox</sup>*. Scale bar: 20 μm.

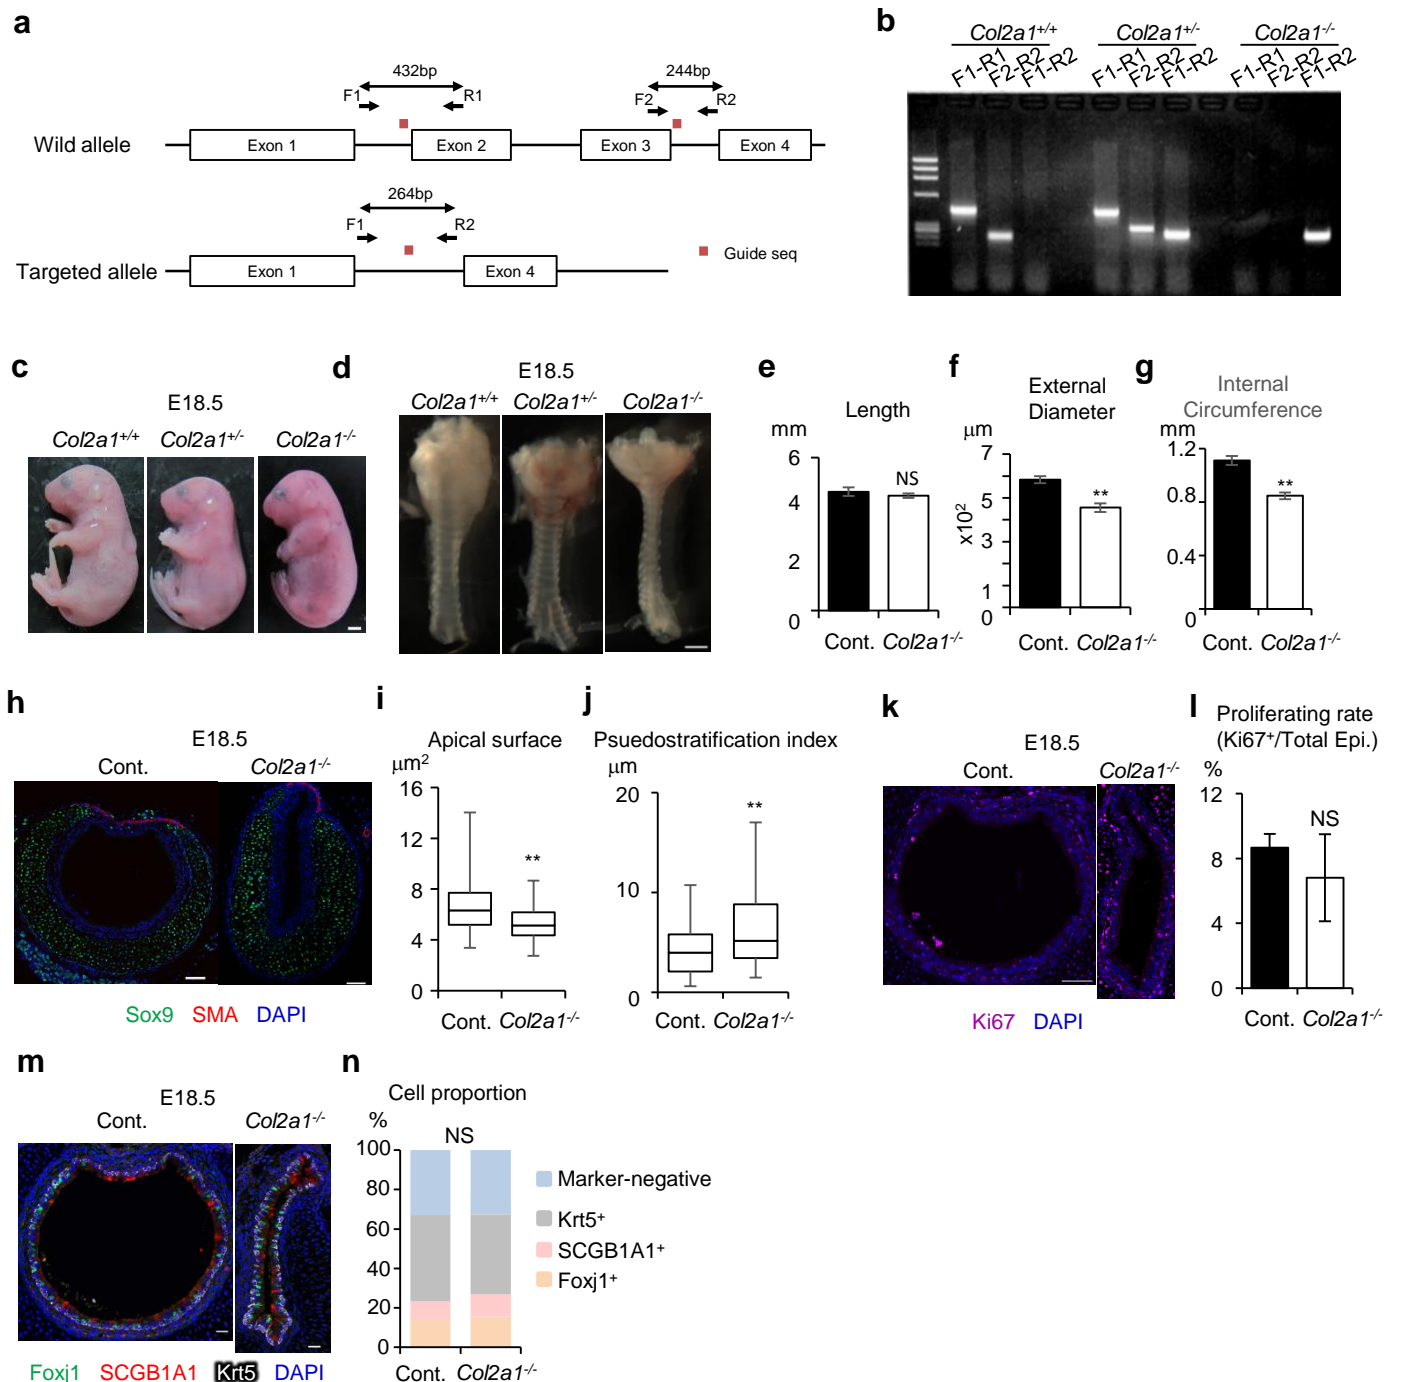

## Supplementary Figure 14 Phase 2 trachea tubulogenesis in *Col2a1*<sup>-/-</sup> mice.

(a) Generation of *Col2a1* knockout mice with CRISPR/CAS9 genome editing technology. Guide RNAs were designed at 1<sup>st</sup> and 3<sup>rd</sup> intron in order to delete exon2 and exon3. (b) Genomic PCR for *Col2a1* genotyping. (c) Gross appearance of *Col2a1*<sup>+/-</sup> and *Col2a1*<sup>-/-</sup> mice. (d - g) Gross morphology of *Col2a1*<sup>+/-</sup> and *Col2a1*<sup>-/-</sup> tracheas (d). Tracheal tube length (e), external diameter (f) (Control; n = 8, *Col2a1*<sup>-/-</sup>; n = 9), and internal circumference (g) (Control; n = 3, *Col2a1*<sup>-/-</sup>; n = 3). (h) Cartilage and SM architecture of *Col2a1*<sup>-/-</sup> trachea at E18.5. Sections were stained for Sox9 (Green), SMA (Red) and DAPI (Blue). (i) Apical surface area of epithelial cells in *Nkx2.1*<sup>Tomato</sup>, *Col2a1*<sup>-/-</sup> trachea at E18.5. Centre line, box limits and whiskers represent mean, 25 and 75% confidence limits, and min and max values, respectively. (Control; n = 140, *Col2a1*<sup>-/-</sup>; n = 60 from 3 embryos, respectively) (j) Pseudostratification index in *Col2a1*<sup>-/-</sup>. Centre line, box limits and whiskers represent mean, 25 and 75% confidence limits, and min and max values, respectively. (Control; n = 58, *Col2a1*<sup>-/-</sup>; n = 118 from 2 embryos, respectively). (k and l) Cell proliferation of epithelial cells in *Col2a1*<sup>-/-</sup> trachea at E18.5. Sections were stained for Ki67 (Magenta) and DAPI (Blue) (k). Proliferating rate of epithelial cells in *Col2a1*<sup>-/-</sup> trachea at E18.5 (l) (Control; n = 878, *Col2a1*<sup>-/-</sup>; n = 672 from 3 embryos, respectively). (m and n) Cell differentiation of epithelial cells in *Col2a1*<sup>-/-</sup> trachea at E18.5. Sections were stained for Foxj1 (Green), SCGB1A1 (Red), Krt5 (Grey), and DAPI (Blue) (m). Cell proportion of epithelial cells in *Col2a1*<sup>-/-</sup> trachea at E18.5 (n) (Control; n = 826, *Col2a1*<sup>-/-</sup>; n = 632 from 3 embryos, respectively). P values (\*; P < 0.05, \*\*; P < 0.01) show the significance with Student's *t*-test, NS, Not Significance, Scale bar, 2000 μm (c), 500 μm (d), 50 μm (h and k), 20 μm (m)



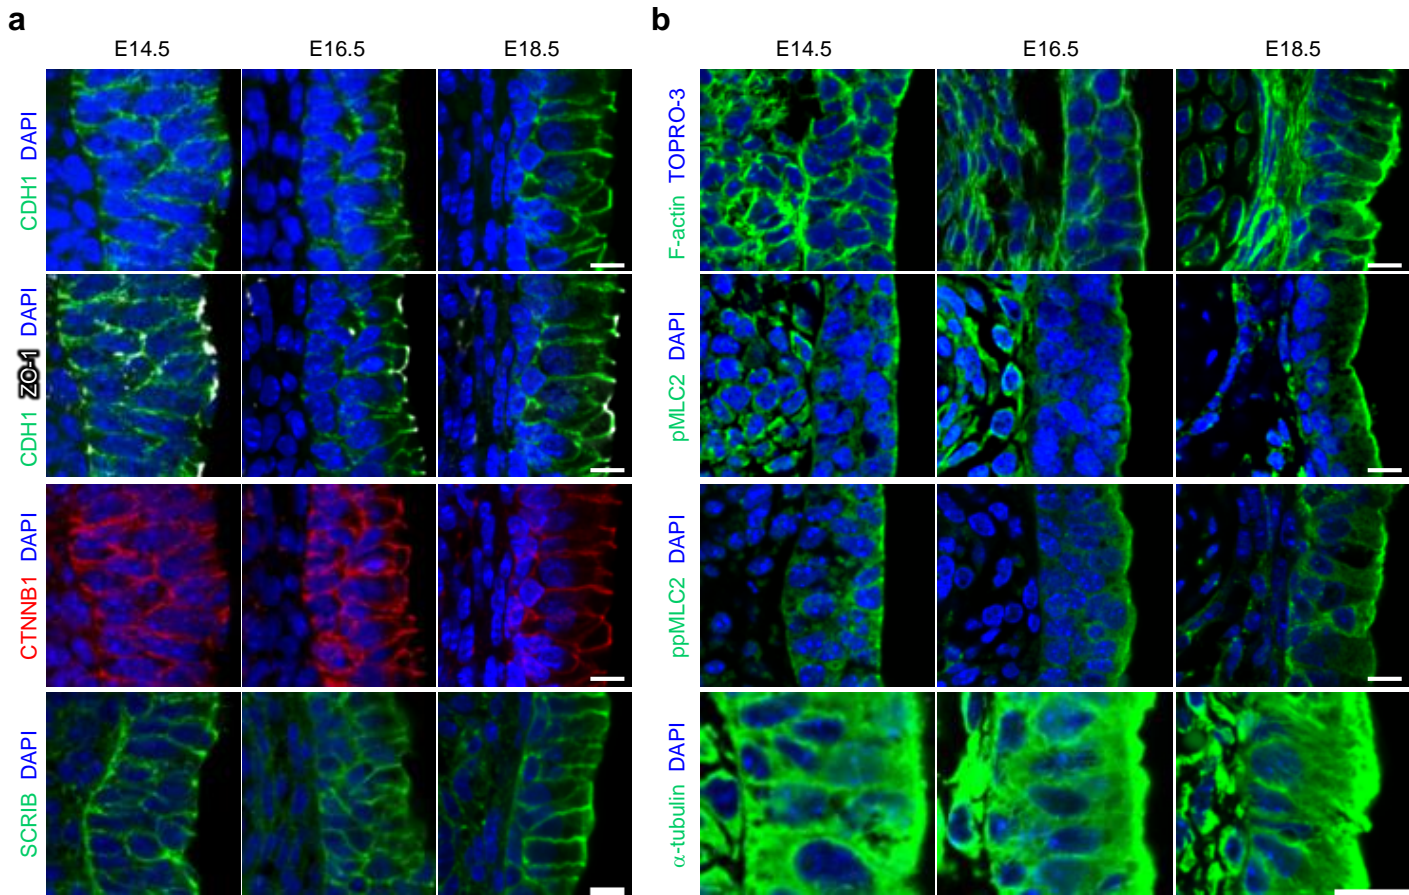

**Supplementary Figure 15 Expression and distribution of adhesion-, polarity-, and cytoskeleton-related proteins.**

(a) Expression and distribution of adhesion- and polarity-related proteins. Sections were stained for CDH1, CTNNB1, ZO-1, or SCRIB. (b) Expression and distribution of cytoskeletal components. Sections were stained for F-actin, pMLC<sup>Ser19</sup>, ppMLC<sup>Thr18/Ser19</sup>, or  $\alpha$ -tubulin. Nuclei were counterstained by DAPI or TOPRO-3. Scale bar; 10  $\mu$ m.

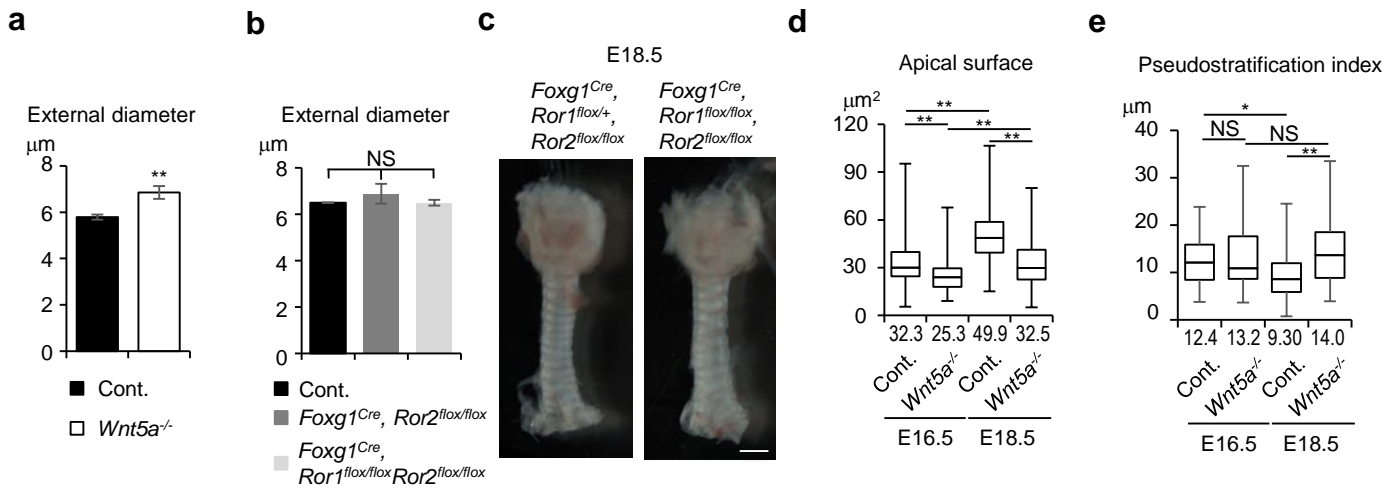

**Supplementary Figure 16 Phase 2 tracheal tubulogenesis in *Wnt5a*/*Ror2* mutant mice.**

(a, b) External diameter of *Wnt5a*<sup>-/-</sup> (a), *Foxg1*<sup>Cre</sup>, *Ror2*<sup>flox/flox</sup>, *Foxg1*<sup>Cre</sup>, *Ror1*<sup>flox/flox</sup>, *Ror2*<sup>flox/flox</sup> trachea (b) at E18.5. Data represent means  $\pm$  SEM (Control; n = 3, *Wnt5a*<sup>-/-</sup>; n = 3, *Foxg1*<sup>Cre</sup>, *Ror2*<sup>flox/flox</sup>; n = 3, *Foxg1*<sup>Cre</sup>, *Ror1*<sup>flox/flox</sup>, *Ror2*<sup>flox/flox</sup>; n = 4). (c) Gross morphology of *Foxg1*<sup>Cre</sup>, *Ror1*<sup>flox/+</sup>, *Ror2*<sup>flox/flox</sup> and *Foxg1*<sup>Cre</sup>, *Ror1*<sup>flox/flox</sup>, *Ror2*<sup>flox/flox</sup> trachea at E18.5. (d) Apical surface area of epithelial cells in *Wnt5a*<sup>-/-</sup> trachea at E16.5 and 18.5. Centre line, box limits and whiskers represent mean, 25 and 75% confidence limits, and min and max values, respectively. Numbers represent means (E16.5; Control, n=171, *Wnt5a*<sup>-/-</sup>, n=163, E18.5; Control, n=262, *Wnt5a*<sup>-/-</sup>, n=152). (e) Pseudostratification index in *Wnt5a*<sup>-/-</sup> tracheas at E16.5 and 18.5. Centre line, box limits and whiskers represent mean, 25 and 75% confidence limits, and min and max values, respectively. Numbers represent means (E16.5; Control, n=125, *Wnt5a*<sup>-/-</sup>, n=96, E18.5; Control, n=109, *Wnt5a*<sup>-/-</sup>, n=130). P values (\*; P<0.05, \*\*; P<0.01) show the significance with Student's *t*-test (a) and Tukey-Kramer method (b, d, e), NS, Not Significance. Scale bar; 500 $\mu\text{m}$
